# Supplementary material for: Altered Epigenetic Marks and Gene Expression in Fetal Brain, and Postnatal Behavioural Disorders, Following Prenatal Exposure of Ogg1 Knockout Mice to Saline or Ethanol
Source: MDPI journal article supplement (doi:10.3390/cells12182308), 2023-09-19
Supplement: s1 [file s1]

**SUPPLEMENTARY ONLINE DATA**

**Altered epigenetic marks and gene expression in fetal brain and postnatal behavioural disorders following prenatal exposure of *Ogg1* knockout mice to saline or ethanol**

Shama Bhatia<sup>1,2</sup>, David Bodenstein<sup>3,☆</sup>, Ashley P. Cheng<sup>1,2,☆</sup> and Peter G. Wells<sup>1,2,3</sup>

1. Dept. of Pharmaceutical Sciences, Faculty of Pharmacy, University of Toronto, Toronto, Ontario, Canada
2. Centre for Pharmaceutical Oncology, Faculty of Pharmacy, University of Toronto, Toronto, Ontario, Canada
3. Dept. of Pharmacology & Toxicology, Faculty of Medicine, University of Toronto, Toronto, Ontario, Canada

☆ These authors contributed equally

## Histone modifications

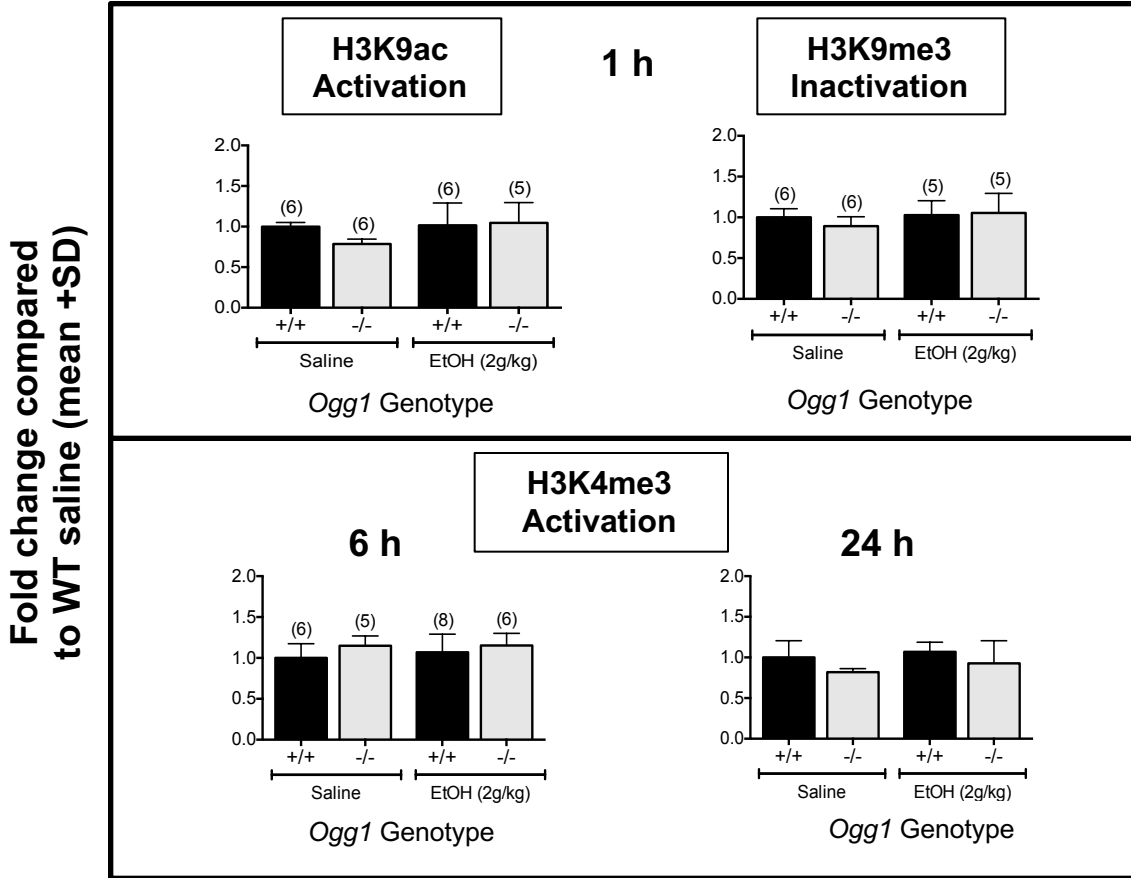

**Figure S1. Histone modifications with no OGG1- or EtOH-dependent differences.** Gestational Day (GD) 17 fetal brains exposed *in utero* to a single dose of EtOH (2 g/kg, i.p.) or its saline vehicle were extracted 1, 6 and 24 h later from *Ogg1*  $+/+$  and  $-/-$  littermates and were assessed for histone modifications (1, 6 and 24 h). No differences observed in H3K9ac (activation mark) and H3K9me3 (inactivation mark) at 1h and in H3K4me3 at 6 and 24 h (1 h not tested). The differences observed were determined using two-way ANOVA and a post-hoc Tukey's test.

## A list of genes with no OGG1- or EtOH-dependent differences in gene expression

| Pathways                                                | mRNA expression<br>(no OGG1-dependent and EtOH-dependent differences) |
|---------------------------------------------------------|-----------------------------------------------------------------------|
| Epigenetic regulation                                   | Dnmt1, Dnmt3a, Hdac11, Mbd2, MeCP2, Smarca2, Tet2                     |
| Neuronal communication, development and differentiation | Drd2, Folr1, Kcne2, Nr2a, Nr2b, Maa, Pdyn, Pnoc, Sema3b               |
| Tight junctions/cell adhesion/synapse                   | Cldn2, Fmr1, Gabrb3, Ncam1, Shank3                                    |
| Antioxidative response/DNA Repair                       | Nrf2, Parp1, Apex1                                                    |
| OGG1-associated genes                                   | Hras, Nras, Otx2, RhoA, Sp1                                           |

**Figure S2. List of genes with no OGG1- or EtOH-dependent differences in expression.** Gestational Day (GD) 17 fetal brains exposed *in utero* to a single dose of EtOH (2 g/kg, i.p.) or its saline vehicle were extracted 6 and 24 h later from *Ogg1* *+/+* and *-/-* littermates and were assessed gene expression. No differences were observed in mRNA levels of the listed genes using the primers shown in **Fig. S8**. The differences observed were determined using two-way ANOVA and a post-hoc Tukey's test. **Abbreviations:** **Apex1:** apurinic/aprimidinic endodeoxyribonuclease 1; **Cldn2:** claudin 2; **Dnmt1:** DNA methyltransferase 1; **Dnmt3a:** DNA methyltransferase 3a; **Drd2:** dopamine receptor D2; **Fmr1:** fragile X mental retardation 1; **Folr1:** folate receptor 1; **Gabrb3:** gamma-aminobutyric acid type A receptor subunit beta 3; **Hdac11:** histone deacetylase 11; **Hras:** Harvey rat sarcoma viral proto-oncogene homolog encoding GTPase; **Kcne2:** potassium voltage-gated channel subfamily E regulatory subunit 2; **Maa:** monoamine oxidase a; **Mbd2:** methyl-CpG binding domain 2; **MeCP2:** methyl-CpG-binding domain protein 2; **Ncam1:** neural cell adhesion molecule 1; **Nr2a:** N-methyl-D-aspartate receptor a; **Nr2b:** N-methyl-D-aspartate receptor b; **Nras:** neuroblastoma RAS viral oncogene homolog encoding GTPase; **Nrf2:** nuclear factor erythroid 2-related factor 2; **Otx2:** orthodenticle homeobox 2; **Parp1:** poly [ADP-ribose] polymerase 1; **Pdyn:** prodynorphin; **Pnoc:** prepronociceptin; **RhoA:** ras homology family member A; **Sema3b:** semaphorin-3B; **Shank3:** SH3 and multiple ankyrin repeat domains 3; **Smarca2:** SWI/SNF-related matrix-associated actin-dependent regulator of chromatin a2; **Sp1:** specificity protein 1; **Tet2:** ten-eleven translocation-2.

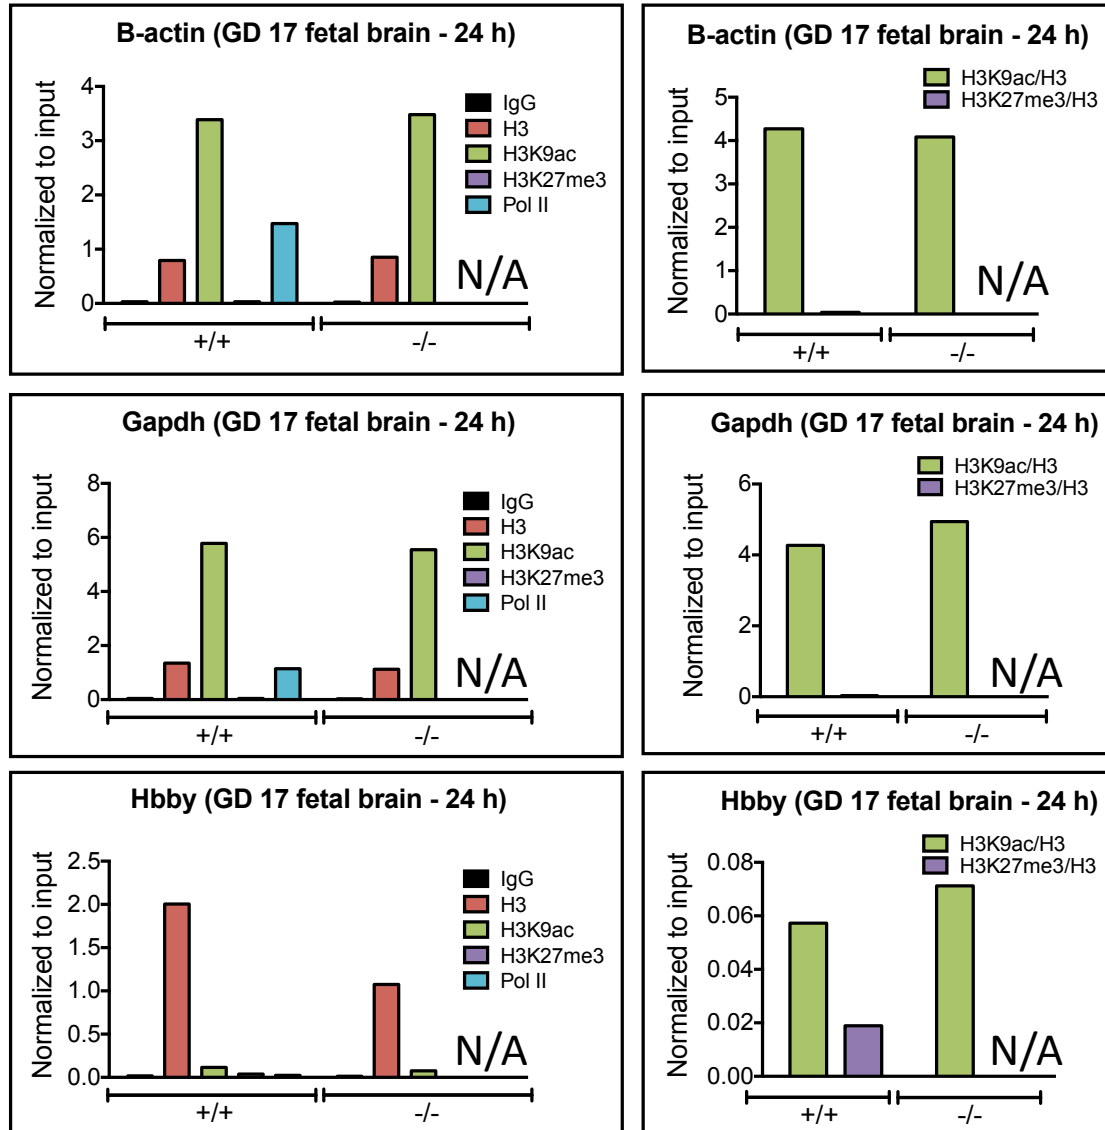

**Figure S3. Controls to validate the ChIP-qPCR technique.**

Positive controls are  $\beta$ -actin and Gapdh, and the negative control is Hbby (hemoglobin subunit beta y). Associations of histone H3 (total histone), histone H3 lysine 9 acetylation (**H3K9ac**, activation mark), histone H3 lysine 27 trimethylation (**H3K27me3**, repressive mark), and RNA polymerase II (**Pol II**, activation mark) with *Esr1* gene were measured via ChIP-qPCR. The positive controls appropriately show enrichment for H3K9ac and Pol II (activation mark) and low levels for H3K27me3 (inactivation mark), as they are constitutively active. Conversely, the negative control appropriately shows a low or absent signal for H3K9ac and Pol II with some enrichment for repressive mark H3K27me3, as *Hbby* is not transcribed in the brain. Association of H3K27me3 and Pol II with  $\beta$ -actin, Gapdh, and the negative control *Hbby* were not measured in *Ogg1*  $-/-$  fetal brain (listed as N/A or not applicable). IgG represents the negative control isotype IgG. Above data represent 1 sample.

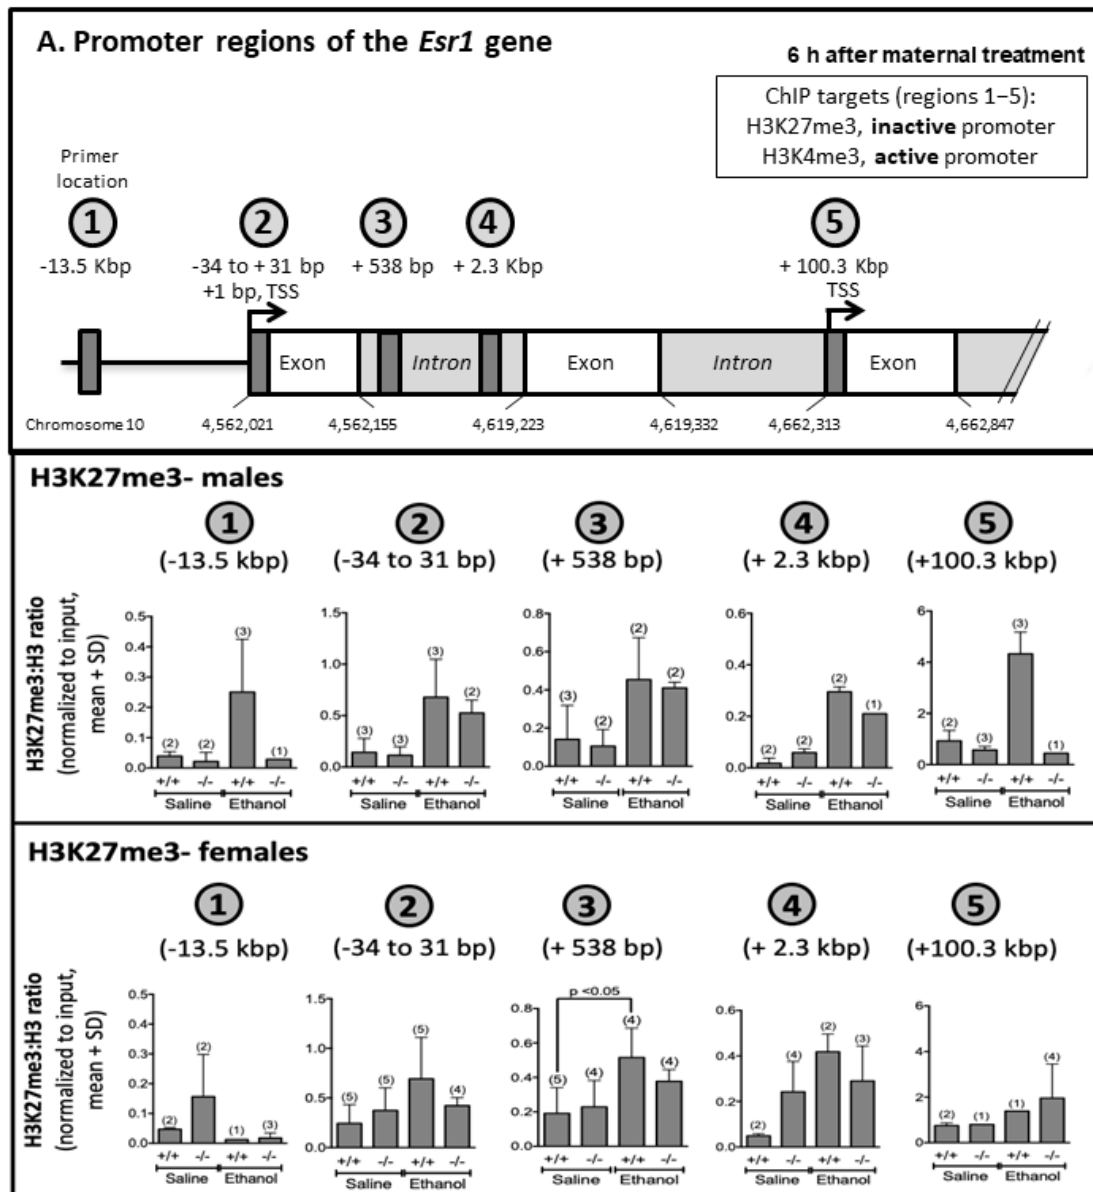

**Figure S4. EtOH-mediated increased association of H3K27me3 with the *Esr1* gene in female *Ogg1*  $+/+$  but not  $-/-$  fetal brains, with a similar trend in males.** Quantitative PCR was performed using five different sets of primers directed against various regions of the *Esr1* gene (Fig. S9), and each of the regions were amplified after chromatin was immunoprecipitated using antibodies against H3K27me3 (inactive promoter) and histone H3 (control). The association of H3K27me3:H3 ratio was normalized to 1 % input in various regions of *Esr1* of fetal brains exposed *in utero* to saline or EtOH. The significance of differences was determined using two-way ANOVA and a post hoc Tukey's test.

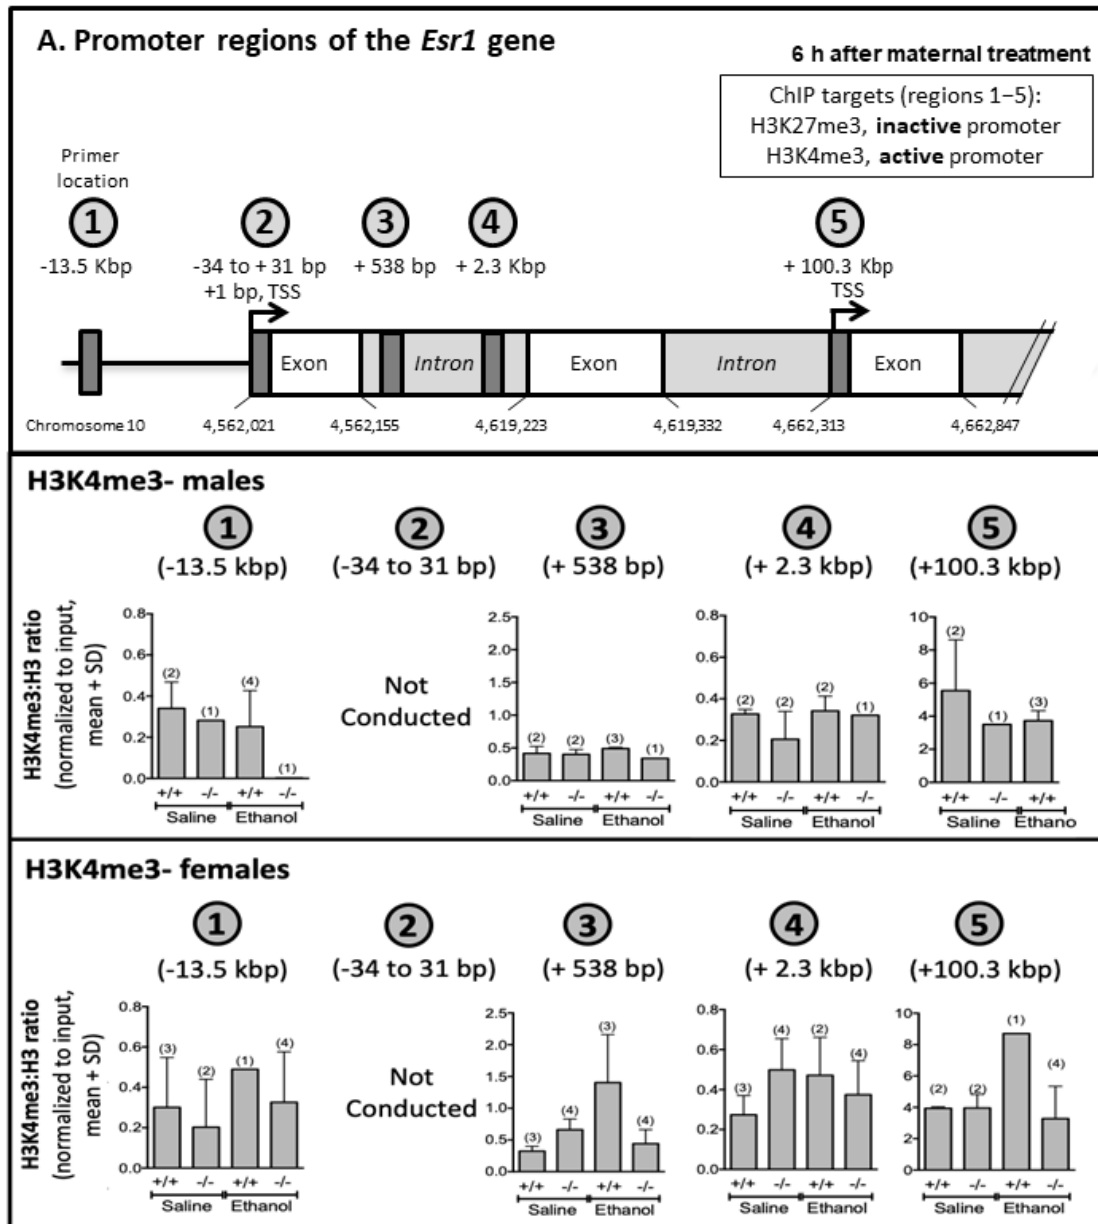

**Figure S5. EtOH-mediated trend for increased association of H3K4me3 with the *Esr1* gene in female *Ogg1* +/+ but not -/- fetal brains.** Quantitative PCR was performed using five different sets of primers directed against various regions of the *Esr1* gene (Fig. S9), and each of the regions were amplified after chromatin was immunoprecipitated using antibodies against H3K4me3 (active promoter) and histone H3 (control). The association of H3K4me3:H3 ratio was normalized to 1 % input in various regions of *Esr1* of fetal brains exposed *in utero* to saline or EtOH. The significance of differences was determined using two-way ANOVA and a post hoc Tukey's test.

### A) Social interaction: measurements in the nonsocial zone

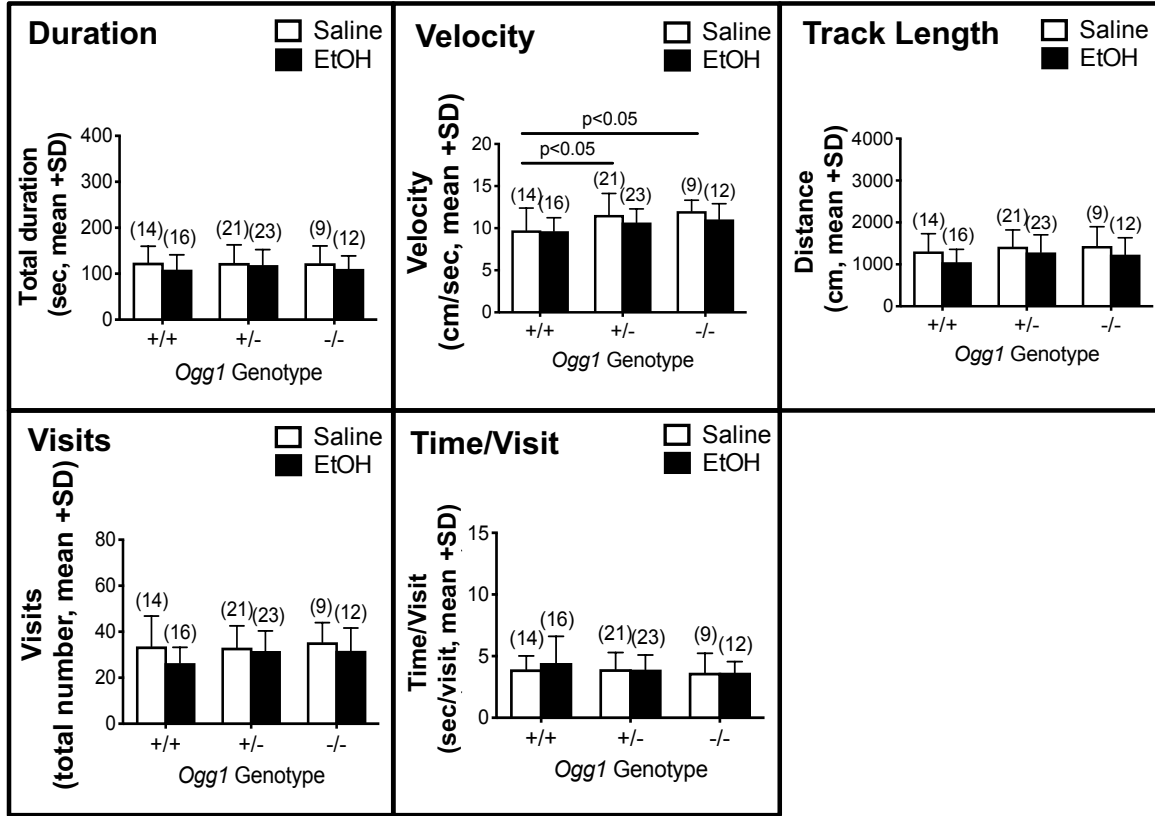

### B) Female-induced ultrasonic vocalizations

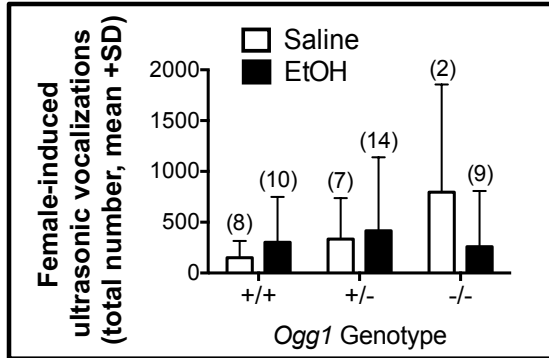

**Figure S6: OGG1- and EtOH-dependent effects on social interaction and female-induced ultrasonic vocalizations.** There were no sex differences, so male and female data were combined. **Panel A.** The test involved placing a mouse in a white walled arena of 62 x 40.5 x 23 cm with a novel social mouse placed inside one of the two inverted wire cups (defined as the social zone, see Fig. 7a), with the other cup placed empty (defined as the nonsocial zone, results shown above). In saline-exposed progeny, OGG1-dependent differences in social interaction were observed only for velocity. No differences were observed in EtOH-exposed progeny. **Panel B.** No differences observed in female-induced ultrasonic vocalizations in *Ogg1* mice, although the number of saline-exposed *Ogg1* -/- progeny was too low (n=2) to draw conclusions for that group. Significance was determined using two-way ANOVA and a post hoc Tukey's test.

## Prepulse Inhibition

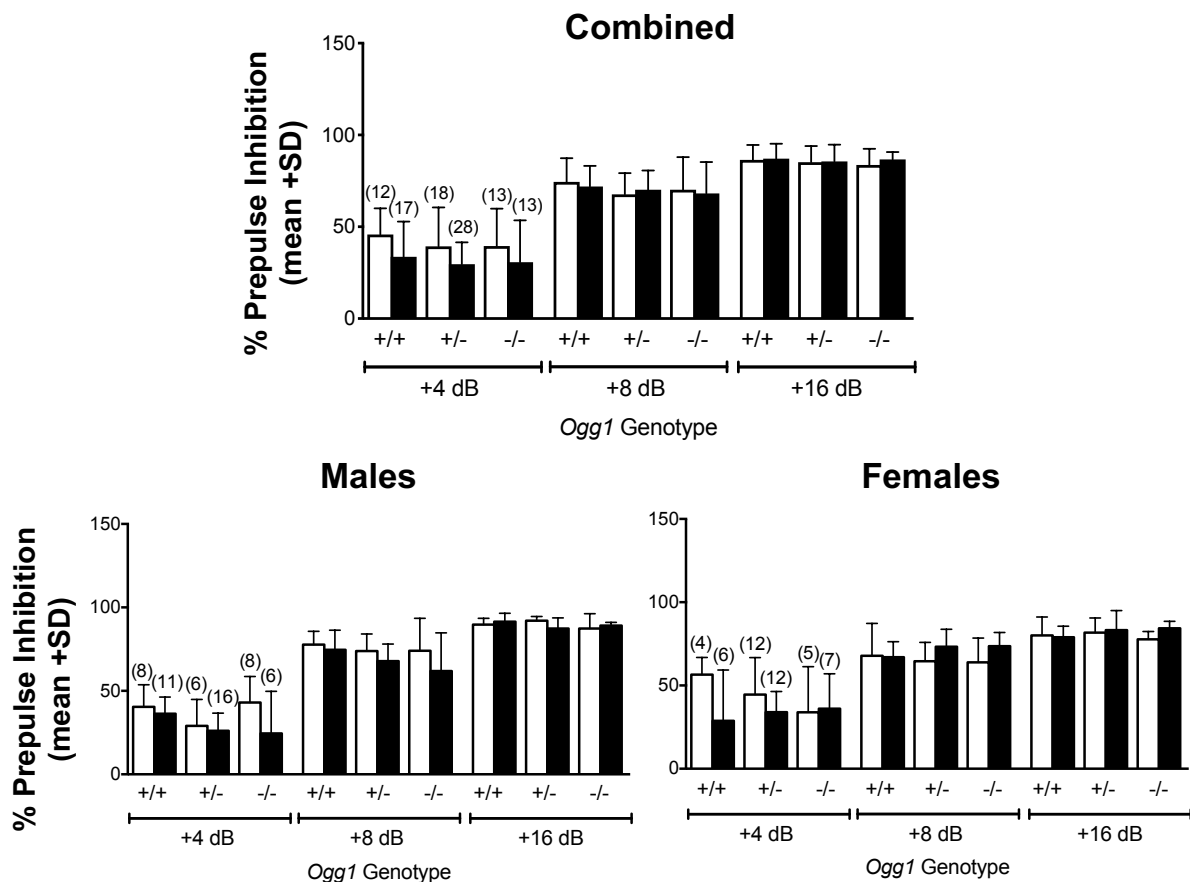

**Figure S7: OGG1- and EtOH-dependent effects on the startle response measured via prepulse inhibition.** No differences were observed aside from the expected decibel dose-response relationship. Significance was determined using two-way ANOVA and a post hoc Tukey's test.



**Genes with OGG1- or EtOH-  
dependent differences**

| RT-qPCR Primers | Primer Sequence (5' to 3')  |
|-----------------|-----------------------------|
| Esr1 Fwd        | AAGTGTTACGAAGTGGGCATGA      |
| Esr1 Rev        | CCCTCCTCGGCGGTCTT           |
| Esr2 Fwd        | CTGTGCCTCTTCTCACAAGGA       |
| Esr2 Rev        | TGCTCCAAGGGTAGGATGGAC       |
| Hdac2 Fwd       | TTGATGGACTCTTTGAGTTTTGTCA   |
| Hdac2 Rev       | GTTTGTTGCCGGTTTAATTTAC      |
| Nlgn3 Fwd       | GATTGCCTCTATCTGAATGTGTATGTG |
| Nlgn3 Rev       | TCCTCGCCCTGTTTCTTAGC        |
| Reln Fwd        | TCACTGTGTCATACGCCAAGAAC     |
| Reln Rev        | GAGGTACAGGATGTGGATGACTGT    |
| Tet1 Fwd        | TTGAGGTCCTACAGCGGACAT       |
| Tet1 Rev        | TGGGTCGATGCCTTGACA          |

**Genes with NO OGG1- or EtOH-  
dependent differences**

| RT-qPCR Primers | Primer Sequence (5' to 3')  |
|-----------------|-----------------------------|
| Apex1 Fwd       | TTTGTGCCGTGAGGGTCTCT        |
| Apex1 Rev       | TGGCATCGCTGTGACGAA          |
| Cldn2 Fwd       | CCTTTCTCTGGACCTAGTCTTGT     |
| Cldn2 Rev       | GCAGGCTCAAGAAGGCATCT        |
| Dnmt1 Fwd       | CACCTAGTTCCTGGCTACGA        |
| Dnmt1 Rev       | CTCCTCTGCAGCCGACTCA         |
| Dnmt3a Fwd      | CGTCCGACGCTCACA             |
| Dnmt3a Rev      | GGGTTGACAATGGAGAGGTCAT      |
| Drd2 Fwd        | CCCTGGGTCGTCTATCTGGAG       |
| Drd2 Rev        | GCGTGTGTTATACAACATAGGCA     |
| Fmr1 Fwd        | GAGGATTGAGGCTGAAATGAGA      |
| Fmr1 Rev        | TTATTGGAAGGTAGGGAAGTGGT     |
| Folr1 Fwd       | TGAGGACAATTACACGACCAG       |
| Folr1 Rev       | TCCGATGTCATAGTCCGAG         |
| Gabrb3 Fwd      | GTCTGGTCTCCAGGAATGTTGC      |
| Gabrb3 Rev      | CACCCACGAGAGGATTGTGA        |
| Gapdh Fwd       | CTCGTCCGTAGACAAAATGG        |
| Gapdh Rev       | TGACCAGGCGCCCAAT            |
| Hdac11 Fwd      | TCACCACGTTACACATCACCTT      |
| Hdac11 Rev      | GCCATCGGACAGCAGCTT          |
| Hras Fwd        | TTTGCCATCAACAACACCAAGT      |
| Hras Rev        | CACCATGGCACATCATCTGA        |
| Kcne2 Fwd       | GTGGATGCCGAGAACTTCTAC       |
| Kcne2 Rev       | CCACCACGATGAACGAGAAC        |
| Mbd2 Fwd        | AGACCCCGAGCGGATGA           |
| Mbd2 Rev        | CCTTGATGCCTTCTCCAGAA        |
| MeCP2 Fwd       | GCCGATCTGCTGGAAGTATG        |
| MeCP2 Rev       | CATTAGGGTCCAAGGAGGTGTCT     |
| Maoa Fwd        | CAATTTCAATCACTCTGGATGACACTA |
| Maoa Rev        | TTTAGCAAGTCGTTCACTTTCC      |
| Ncam1 Fwd       | TCATGTGCATCGCTGTTAAC        |
| Ncam1 Rev       | CCGTTCCGACCTCCACAAT         |
| Nr2a Fwd        | GTGGTGATCGTGCTGAATAAGG      |
| Nr2a Rev        | ATGCCGACGGCTCAGAGT          |
| Nr2b Fwd        | CTATCCTGCAGCTGTTGGAGAT      |
| Nr2b Rev        | GGCTGCTCATAACCTCATTCTC      |
| Nras Fwd        | CCTCTACAGGGAGCAAAATAGC      |
| Nras Rev        | CCAGTGTGTAAAAGGCATCCTC      |
| Nrf2 Fwd        | TCTCTGGAGGCAGCCATGA         |
| Nrf2 Rev        | CTGCTTGTTCGTTATTAAGACACT    |
| Otx2 Fwd        | ACCCGGTACCAGACATCTTC        |
| Otx2 Rev        | GCGGCACTTAGCTCTTCGAT        |
| Parp1 Fwd       | CCCATCGACGTCAACTACGA        |
| Parp1 Rev       | CGTGGTAGCATGAGTGTTCTTCA     |
| Pdyn Fwd        | TGTGGCACTTCTCTGAGCTAGAGT    |
| Pdyn Rev        | CCCCACGCAGATCTCAA           |
| Pnoc Fwd        | CCCTGCACCAGAATGGTAATG       |
| Pnoc Rev        | CCGGCTGCAGGTCTTG            |
| RhoA Fwd        | ACGGGAGTTGGCCAAAATG         |
| RhoA Rev        | TGTTTGCCATATCTGCCTTCT       |
| Sema3b Fwd      | TCCCGCTGGCTCAATGAA          |
| Sema3b Rev      | GCGGACTCGCGGAAGAA           |
| Shank3 Fwd      | GACTGTGTGGAAGAAGTGACAGATG   |
| Shank3 Rev      | CGTCCGGTCTCTCTGGTT          |
| Smarca2 Fwd     | GCCATCATTGATACTGTGATAAATACA |
| Smarca2 Rev     | TCCACTGGCTTCTAATTAATTCAT    |
| Sp1 Fwd         | TCTGATCTCCAACCCCAAGCT       |
| Sp1 Rev         | CTTTGCCGATCCTTGGAT          |
| Tet2 Fwd        | GTTTGGACTTCTCTGCTATTCC      |
| Tet2 Rev        | CGACTTCTCGATTGTCTTCTATTG    |

**Figure S8:** Primer sequences used to analyze mRNA levels of genes via RT-qPCR.

| ChIP-qPCR Primers       | Primer Sequence (5' to 3') | Relative to Transcription Start Site (bp) | Amplicon product Size (bp) |
|-------------------------|----------------------------|-------------------------------------------|----------------------------|
| <b>Controls</b>         |                            |                                           |                            |
| B-actin Fwd             | CGGAGGCTATTCTGTACATC       | -260                                      | 91                         |
| B-actin Rev             | GCGAGAGAGAAAGCGAGATT       |                                           |                            |
| Gapdh Fwd               | GCCACGCTAATCTCATTTTCTTC    | 1126                                      | 69                         |
| Gapdh Rev               | TTCACACCGACCTTCACCATT      |                                           |                            |
| Hbby Fwd                | CTGACCCTCCCATGACCT         | -134                                      | 90                         |
| Hbby Rev                | TCTGACCCTTTGTTCTGCAT       |                                           |                            |
| <b><i>Esr1</i> Gene</b> |                            |                                           |                            |
| <i>Esr1</i> Fwd         | ACTGCTGAGCCACGGACTTAG      | - 407                                     | 65                         |
| <i>Esr1</i> Rev         | TGAGCGCTTCTCAGAGTTTCTCT    |                                           |                            |
| <i>Esr1</i> Fwd         | TGGTGGTGCTAGCTCTTTGCT      | -34                                       | 65                         |
| <i>Esr1</i> Rev         | CGAGGCTGTTATGACCATGAAAT    |                                           |                            |
| <i>Esr1</i> Fwd         | AACCGAGGTCTATGGAATGGAA     | -13.5 kpb                                 | 65                         |
| <i>Esr1</i> Rev         | CCTCTCCACAGACACCGTGAA      |                                           |                            |
| <i>Esr1</i> Fwd         | TCCTGCTCCGACTTCACTTTG      | +538 bp                                   | 64                         |
| <i>Esr1</i> Rev         | ACAGCACCGAAGATTAAGAAACG    |                                           |                            |
| <i>Esr1</i> Fwd         | CAGGTAGCTTTTGCTAAGGATGGT   | + 2.3 kbp                                 | 76                         |
| <i>Esr1</i> Rev         | AGAAAAAGGACTACTGGAACATTGC  |                                           |                            |
| <i>Esr1</i> Fwd         | GCGCTGCGCCTTCTCTAA         | + 100.3 kbp                               | 53                         |
| <i>Esr1</i> Rev         | CGTGGGCCACCTGGAA           |                                           |                            |

**Figure S9:** Primer sequences used to analyze the association of histone modifications on various sites of the *Esr1* gene and control genes via ChIP-qPCR.
